# Supplementary figures and images for: The Human 2-Cys Peroxiredoxins form Widespread, Cysteine-Dependent- and Isoform-Specific Protein-Protein Interactions
Source: MDPI journal article supplement (doi:10.3390/antiox10040627), 2021-04-20

S1

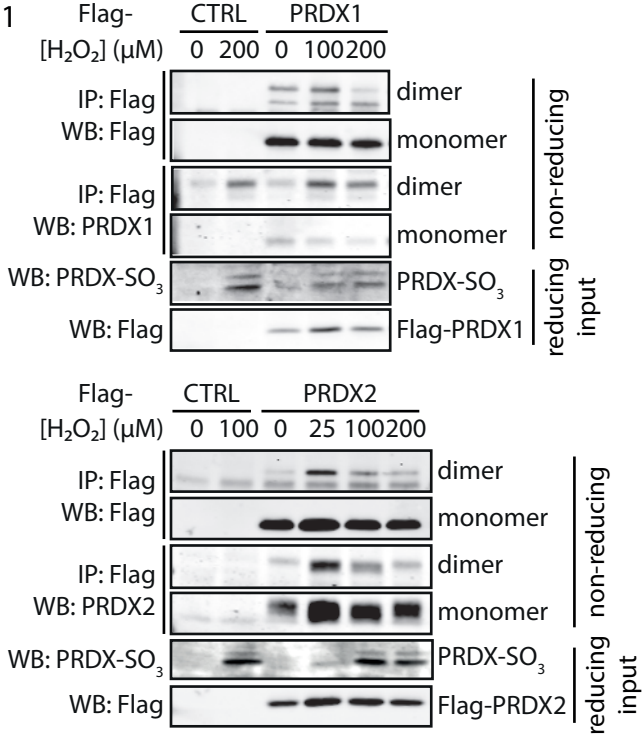

S2

number of proteins

PRDX1

PRDX2

PRDX3

PRDX4

PRDX5

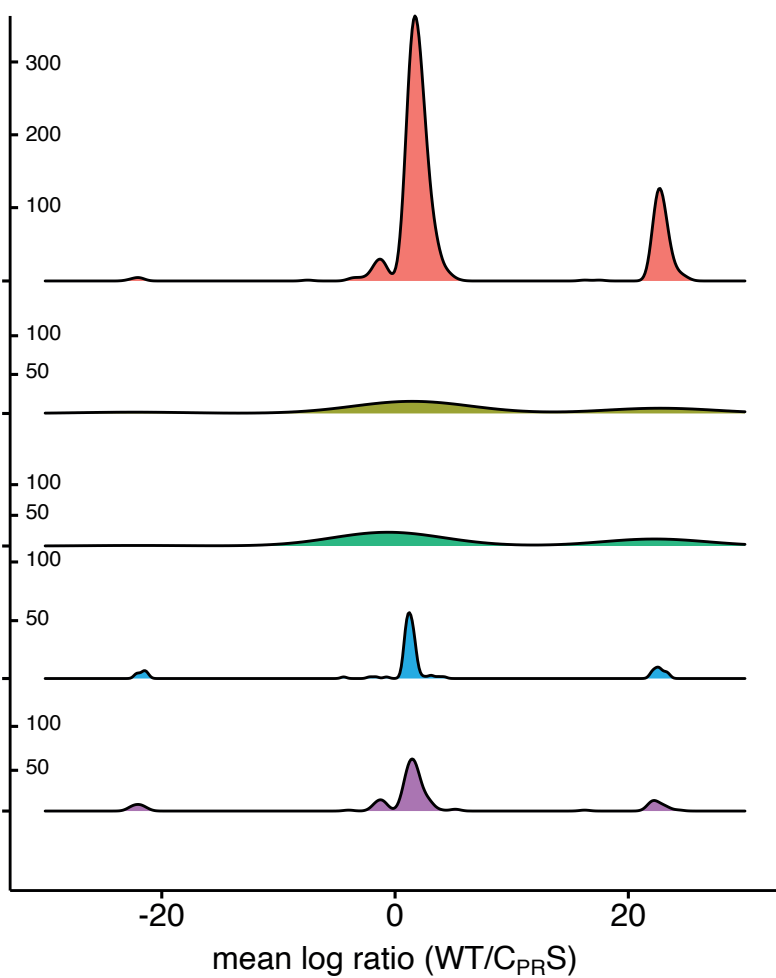

S3

 $\log_2$  difference WT/C<sub>PR</sub>S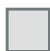

Random

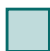

Real

5% 0.02% FDR

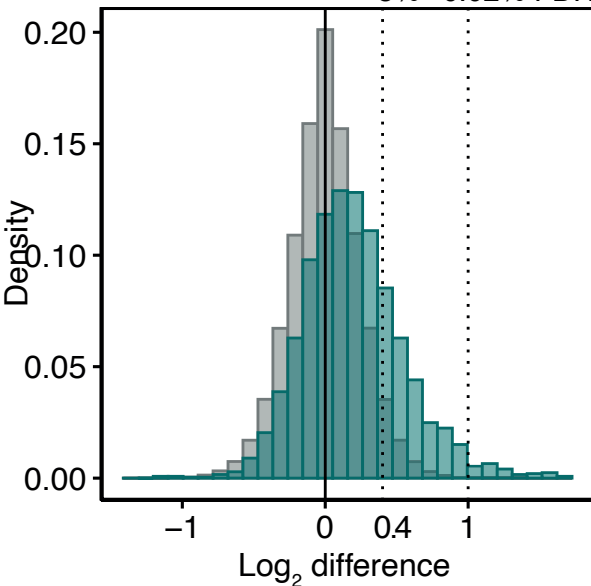

S5

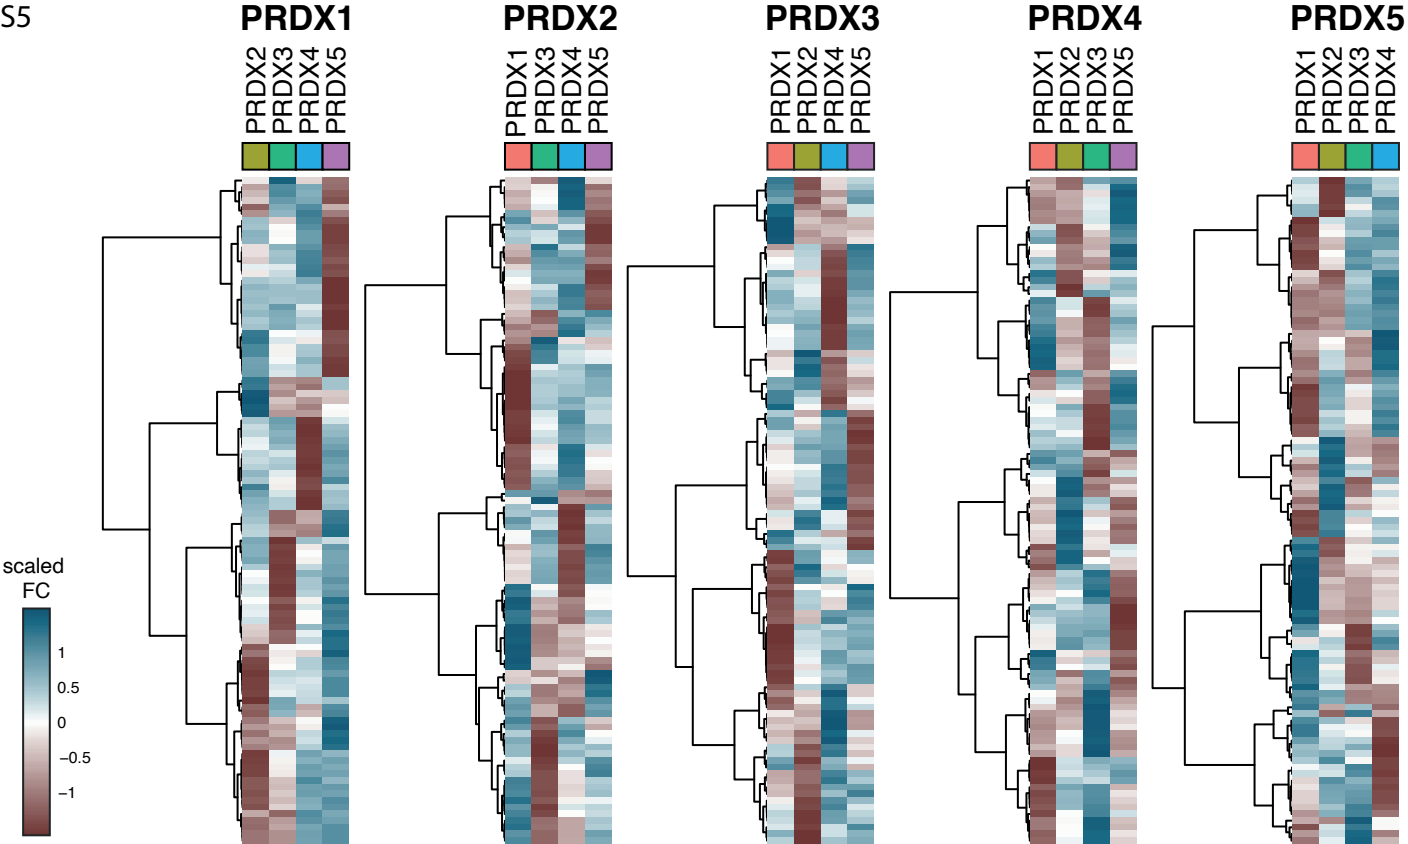

S4

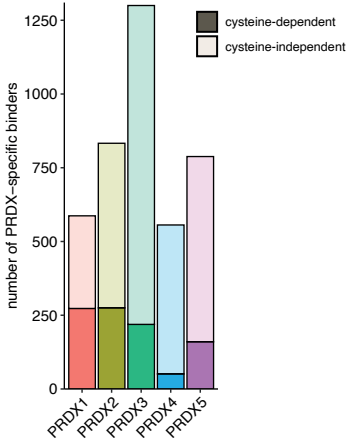

Supplement: s1 [file s1]
